# Supplementary material for: Biomarkers Related to Synaptic Dysfunction to Discriminate Alzheimer’s Disease from Other Neurological Disorders
Source: MDPI journal article supplement (doi:10.3390/ijms231810831), 2022-09-16
Supplement: s1 [file s1]

# Supplementary materials

**Table S1-** List of Neurodegenerative disorders of n-AD patients.

| Disorders                                      | no. |
|------------------------------------------------|-----|
| Cerebral Degeneration due to Iron accumulation | 1   |
| Cortico-Basal Degeneration (CBD)               | 10  |
| Frontotemporal Dementia (FTD)                  | 20  |
| Lewy’s bodies Dementia (LBD)                   | 10  |
| Multisystemic Atrophy (MSA)                    | 1   |
| Parkinson’s disease (PD)                       | 7   |
| Pick’s Dementia                                | 1   |

**Table S2-** List of neurological disorders of n-ND patients.

| <b>Disorders</b>               | <b>no.</b> |
|--------------------------------|------------|
| Neuralgia                      | 3          |
| Dystrophy                      | 2          |
| Psychic disorders              | 11         |
| Hemorrhages/Tumor              | 5          |
| Encephalopathies               | 7          |
| Epilepsy                       | 4          |
| Normal Pressure Hydrocephalous | 15         |
| Ischemia                       | 3          |
| Leukoencephalopathies          | 3          |
| Myelitis                       | 1          |
| Myelopathy                     | 10         |
| Neuropathy/Polyneuropathy      | 29         |
| Forestier's syndrome           | 1          |
| Multiple Sclerosis             | 1          |
| Fibromyalgia                   | 1          |
| Myopathy                       | 2          |

**Table S-3.** CSF levels of AD-related biomarkers (i.e., A $\beta$  42, pTau, tTau, and A $\beta$  42/40) in AD and n-AD patients.

| Variables             | AD<br>(n=69)          | non-AD<br>(n=50)      | Size<br>effect<br>( $\eta^2$ ) | <i>p</i>         |
|-----------------------|-----------------------|-----------------------|--------------------------------|------------------|
| A $\beta$ 42 (pg/ml)  | 600 (443 – 778)       | 763 (558.5 – 1150.5)  | 0.067                          | 0.017            |
| A $\beta$ 42/40 ratio | 0.051 (0.040 – 0.079) | 0.098 (0.072 – 0.102) | 0.233                          | <b>&lt;0.001</b> |
| pTau (pg/ml)          | 77.2 (43.5 – 97.9)    | 30.6 (20.3 – 39.5)    | 0.305                          | <b>&lt;0.001</b> |
| tTau (pg/ml)          | 562 (402 – 798)       | 269 (192 – 375)       | 0.273                          | <b>&lt;0.001</b> |

Data are expressed as median with interquartile ranges (IQR) and are analyzed by Mann-Whitney U-test, also indicating the size effect ( $\eta^2$ ). P-values are corrected for multiplicity by the Holm-Sidak method and are indicated with bold font.

**Table S-4.** Coefficients of linear regression models testing association of Ng,  $\alpha$ -Syn, A $\beta$ 42/Ng or A $\beta$ 42/  $\alpha$ -Syn with clinical features and other AD-related biomarkers in AD group.

| Variables           | Unstandardized Coefficients |                | Standardized Coefficients | T      | p      |
|---------------------|-----------------------------|----------------|---------------------------|--------|--------|
|                     | B                           | Standard error | beta                      |        |        |
| Ng (cost.)          |                             |                |                           |        |        |
| MMSE <24            | 247.759                     | 71.299         | 0.563                     | 3.475  | 0.034  |
| Aβ 42/40 <0.062     | 223.797                     | 61.016         | 0.450                     | 3.668  | 0.001  |
| pTau>61pg/ml        | 216.011                     | 50.475         | 0.530                     | 4.280  | <0.001 |
| tTau> 416 pg/ml     | 212.493                     | 56.439         | 0.446                     | 3.765  | <0.001 |
| Apo E4              | 159.700                     | 58.438         | 0.340                     | 2.733  | 0.008  |
| αSyn (cost.)        |                             |                |                           |        |        |
| Aβ 42/40 <0.062     | 711.559                     | 257.650        | 0.404                     | 2.762  | 0.009  |
| pTau>61pg/ml        | 685.719                     | 259.355        | 0.399                     | 2.644  | 0.012  |
| Aβ 42/Ng (cost.)    |                             |                |                           |        |        |
| MMSE<24             | -1.031                      | 0.236          | -0.651                    | -4.368 | <0.001 |
| PET AD-related      | -1.290                      | 0.417          | -0.362                    | -3.093 | 0.003  |
| Aβ 42 < 0.650pg/ml  | -0.763                      | 0.133          | -0.609                    | -5.751 | <0.001 |
| Aβ 42/40 < 0.062    | -1.079                      | 0.127          | -0.762                    | -8.479 | <0.001 |
| pTau>61pg/ml        | -0.860                      | 0.137          | -0.680                    | -6.285 | <0.001 |
| tTau > 416 pg/ml    | -0.926                      | 0.132          | -0.684                    | -7.007 | <0.001 |
| Apo E4              | -0.475                      | 0.164          | -0.362                    | -2.905 | 0.005  |
| Aβ 42/α-Syn (cost.) |                             |                |                           |        |        |
| MMSE < 24           | -0.016                      | 0.002          | -0.539                    | -2.793 | 0.012  |
| PET AD-related      | -0.009                      | 0.004          | -0.349                    | -2.381 | 0.022  |
| Aβ 42 < 0.650pg/ml  | -0.006                      | 0.001          | -0.605                    | -4.927 | <0.001 |
| Aβ 42/40 < 0.062    | -0.009                      | 0.001          | -0.779                    | -7.657 | <0.001 |
| pTau>61pg/ml        | -0.008                      | 0.001          | -0.717                    | -6.166 | <0.001 |
| tTau > 416 pg/ml    | -0.008                      | 0.001          | -0.703                    | -6.413 | <0.001 |
